# Supplementary material
Source: Springer Nature journal article supplement (https://www.springermedizin.de/resource/supplementary/12905_2001_6_MOESM1_ESM.pdf/9518862)
Supplement: MOESM1 [file 9518862]

Warming up

5min

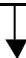

Stretching, Calisthenics

20min

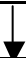

Walking or Jogging

15min

~ Rest (recreation game) ~

Strength training

15min

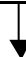

Rhythm dance

15min

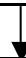

Cooling down

15min
